# Supplementary material
Source: PubMed Central journal article supplement (PMC8256086)

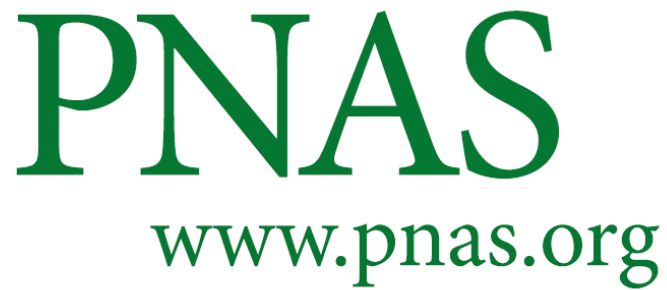

**Supplementary Information for**

Serial sarcomere number is substantially decreased within the paretic biceps brachii in individuals with chronic hemiparetic stroke

Amy N. Adkins, Julius P.A. Dewald, Lindsay Garmirian, Christa M. Nelson, Wendy M. Murray

Wendy M Murray

Email: [w-murray@northwestern.edu](mailto:w-murray@northwestern.edu)

**This PDF file includes:**

Figures S1

**Figure S1.** Histograms of all sarcomere length measures made per stroke participant (A) and each participant who hadn't undergone a stroke (B). The non-paretic and dominant arms are shown in blue and the paretic and non-dominant arms are shown in orange. Participants 1-11 match up with participant 1-11 in Table 1. All y-axes have been scaled uniformly, based on the maximum count (70) that makes the data for the majority of participants most viewable. Insets are provided for the 2 participants (Stroke 2, Stroke 7) for which the amount of data exceeded these limits.

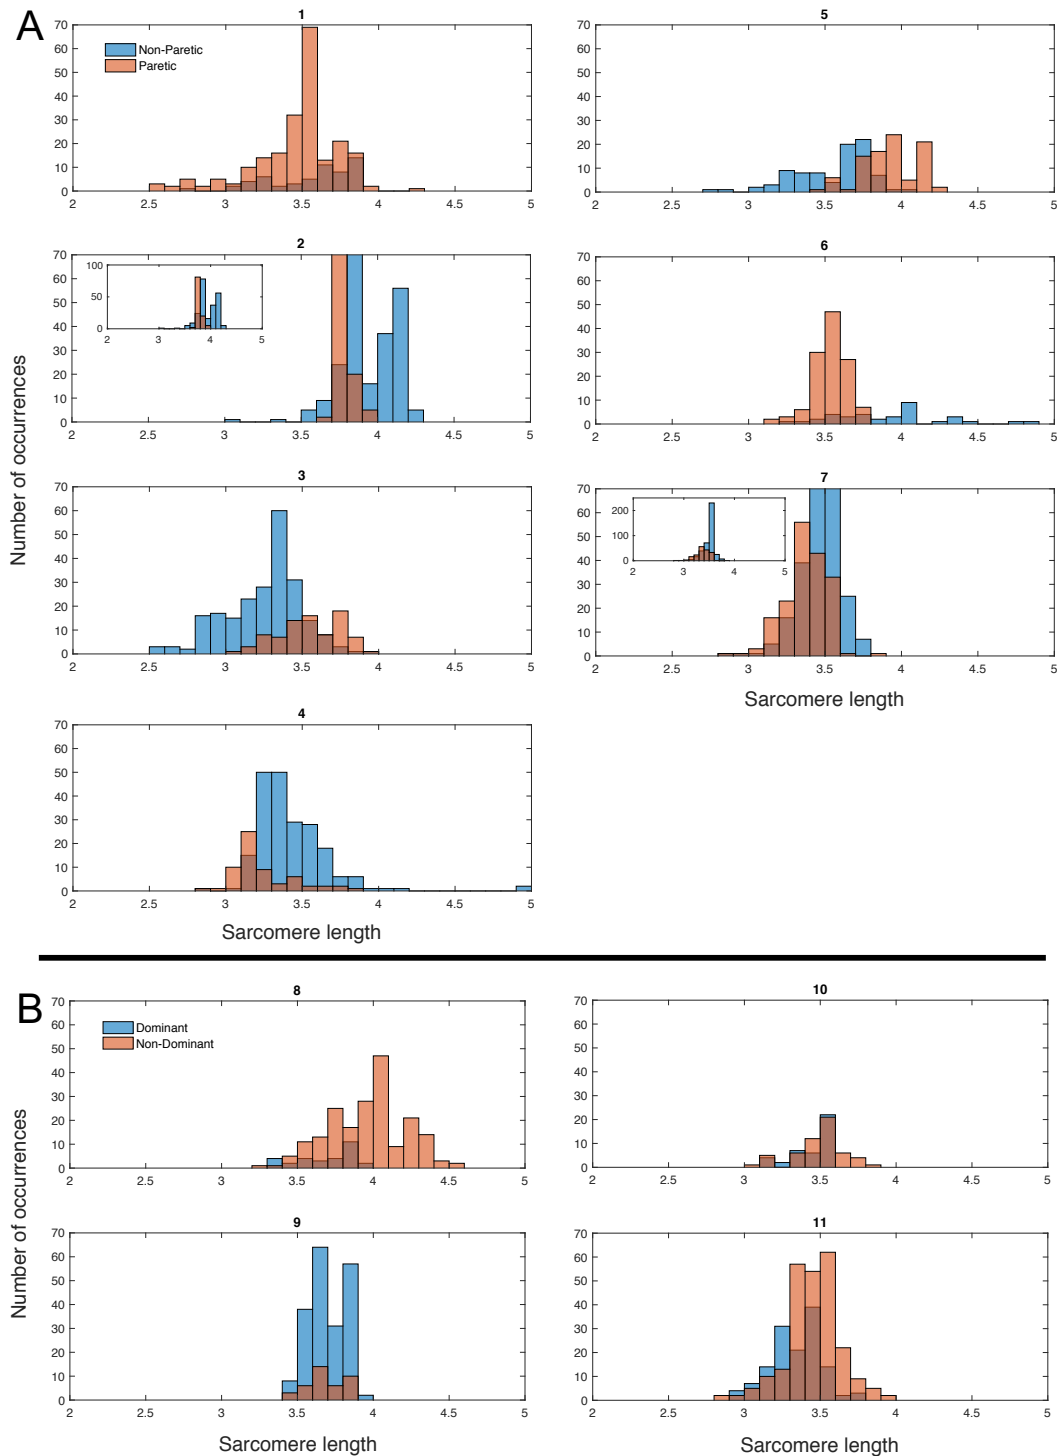

Supplement: pnas.2008597118.sapp.pdf [file pnas.2008597118.sapp.pdf]
